# Supplementary material for: Benefits of Innovative and Fully Water-Compatible Stationary Phases of Thin-Film Microextraction (TFME) Blades
Source: MDPI journal article supplement (doi:10.3390/molecules26154413), 2021-07-21
Supplement: s1 [file s1]

Supplementary Material for:

**Benefits of innovative and fully water-compatible stationary phases of  
thin-film microextraction (TFME) blades**

by Łukasz Sobczak, Dominika Kołodziej and Krzysztof Goryński

**List of contents:**

Table S1. Coefficients of determination ( $R^2$ ) determined during calibration runs in different desorption solvents.

Table S2. Number of results in each category for every stationary phase – desorption solvent combination.

Table S3. Extraction efficacies [%] for each stationary phase – desorption solvent combination.

Table S4. Essential physicochemical proprieties of the analysed substances.

Table S5. List of reference standards in alphabetical order.

Table S6. Monitored precursor – product ion(s) transitions.

Table S1. Coefficients of determination ( $R^2$ ) determined during calibration runs in different desorption solvents. *Substances arranged by retention order.*

| substance         | coefficient of determination ( $R^2$ ) in desorption solvent composition: |                                 |                             |
|-------------------|---------------------------------------------------------------------------|---------------------------------|-----------------------------|
|                   | isopropanol/water (80/20, v/v)                                            | acetonitrile/water (80/20, v/v) | methanol/water (80/20, v/v) |
| fenoterol         | 0.9996                                                                    | 0.9999                          | 0.9982                      |
| carteolol         | 0.9993                                                                    | 0.9996                          | 1.0000                      |
| oxycodone         | 0.9991                                                                    | 0.9985                          | 0.9984                      |
| hydrocodone       | 0.9992                                                                    | 0.9998                          | 0.9991                      |
| ketamine          | 0.9989                                                                    | 0.9998                          | 1.0000                      |
| remifentanil acid | 0.9993                                                                    | 0.9984                          | 0.9995                      |
| metoprolol        | 1.0000                                                                    | 0.9998                          | 0.9980                      |
| 6-acetylcodeine   | 0.9995                                                                    | 0.9998                          | 1.0000                      |
| methylphenidate   | 0.9999                                                                    | 0.9998                          | 0.9995                      |
| zolpidem          | 1.0000                                                                    | 0.9991                          | 1.0000                      |
| cocaine           | 0.9994                                                                    | 0.9999                          | 0.9989                      |
| LSD               | 0.9999                                                                    | 0.9999                          | 0.9973                      |
| melatonin         | 0.9999                                                                    | 0.9997                          | 0.9996                      |
| bisoprolol        | 0.9998                                                                    | 0.9999                          | 0.9997                      |
| phencyclidine     | 0.9998                                                                    | 0.9993                          | 0.9991                      |
| cortisol          | 0.9978                                                                    | 0.9994                          | 0.9998                      |
| buprenorphine     | 0.9996                                                                    | 0.9992                          | 0.9999                      |
| alprazolam        | 0.9975                                                                    | 0.9997                          | 0.9989                      |
| anastrozole       | 1.0000                                                                    | 0.9997                          | 0.9984                      |
| methadone         | 0.9982                                                                    | 1.0000                          | 0.9999                      |
| 11-deoxycortisol  | 0.9944                                                                    | 0.9999                          | 0.9978                      |
| boldenone         | 1.0000                                                                    | 0.9981                          | 0.9988                      |
| clonazepam        | 0.9991                                                                    | 0.9976                          | 0.9991                      |
| agomelatine       | 0.9989                                                                    | 0.9998                          | 0.9999                      |
| methandienone     | 0.9993                                                                    | 0.9999                          | 0.9980                      |
| flunitrazepam     | 0.9998                                                                    | 0.9999                          | 0.9999                      |
| androstenedione   | 0.9990                                                                    | 0.9991                          | 0.9999                      |
| canrenone         | 0.9919                                                                    | 0.9912                          | 0.9999                      |
| progesterone      | 0.9999                                                                    | 0.9998                          | 0.9999                      |
| THC-COOH          | 0.9978                                                                    | 0.9998                          | 1.0000                      |

Table S2. Number of results in each category for every stationary phase – desorption solvent combination. *Table arranged by the type of stationary phase.*

| stationary phase + desorption solvent combination | number of results:                |                                               |              |
|---------------------------------------------------|-----------------------------------|-----------------------------------------------|--------------|
|                                                   | above median (in Q <sub>2</sub> ) | in 3 <sup>rd</sup> quartile (Q <sub>3</sub> ) | best results |
| 5 µm + DS1a                                       | 2                                 | -                                             | -            |
| 5 µm + DS1n                                       | -                                 | -                                             | -            |
| 5 µm + DS1b                                       | 12                                | 1                                             | -            |
| 5 µm + DS2a                                       | 5                                 | -                                             | -            |
| 5 µm + DS2n                                       | -                                 | -                                             | -            |
| 5 µm + DS2b                                       | 6                                 | -                                             | -            |
| 5 µm + DS3a                                       | -                                 | -                                             | -            |
| 5 µm + DS3n                                       | 1                                 | 1                                             | -            |
| 5 µm + DS3b                                       | 10                                | 1                                             | -            |
| 10 µm + DS1a                                      | 22                                | 17                                            | -            |
| 10 µm + DS1n                                      | 6                                 | 1                                             | -            |
| 10 µm + DS1b                                      | 28                                | 6                                             | -            |
| 10 µm + DS2a                                      | 29                                | 13                                            | -            |
| 10 µm + DS2n                                      | 28                                | 13                                            | -            |
| 10 µm + DS2b                                      | 23                                | 1                                             | -            |
| 10 µm + DS3a                                      | 28                                | 18                                            | -            |
| 10 µm + DS3n                                      | 14                                | 5                                             | 1            |
| 10 µm + DS3b                                      | 28                                | 8                                             | 1            |
| 10 µm with polar end-capping + DS1a               | 10                                | 2                                             | -            |
| 10 µm with polar end-capping + DS1n               | 3                                 | -                                             | -            |
| 10 µm with polar end-capping + DS1b               | 9                                 | 5                                             | -            |
| 10 µm with polar end-capping + DS2a               | 20                                | 15                                            | -            |
| 10 µm with polar end-capping + DS2n               | 20                                | 8                                             | -            |
| 10 µm with polar end-capping + DS2b               | -                                 | -                                             | -            |
| 10 µm with polar end-capping + DS3a               | 30                                | 27                                            | 18           |
| 10 µm with polar end-capping + DS3n               | 5                                 | 1                                             | -            |
| 10 µm with polar end-capping + DS3b               | 3                                 | 2                                             | -            |
| 45 µm + DS1a                                      | 24                                | 14                                            | -            |
| 45 µm + DS1n                                      | 14                                | 4                                             | -            |
| 45 µm + DS1b                                      | 29                                | 26                                            | 1            |
| 45 µm + DS2a                                      | 25                                | 12                                            | 1            |
| 45 µm + DS2n                                      | 23                                | 12                                            | -            |
| 45 µm + DS2b                                      | 18                                | 10                                            | -            |
| 45 µm + DS3a                                      | 30                                | 28                                            | 8            |
| 45 µm + DS3n                                      | 15                                | 7                                             | -            |
| 45 µm + DS3b                                      | 20                                | 12                                            | -            |

Desorption solvents compositions: DS1a = isopropanol/water/formic acid (80/19.9/0.1, v/v); DS1n = isopropanol/water (80/20, v/v); DS1b = isopropanol/water/ammonium hydroxide (80/19.9/0.1, v/v); DS2a = acetonitrile/water/formic acid (80/19.9/0.1, v/v); DS2n = acetonitrile/water (80/20, v/v); DS2b = acetonitrile/water/ammonium hydroxide (80/19.9/0.1, v/v); DS3a = methanol/water/formic acid (80/19.9/0.1, v/v); DS3n = methanol/water (80/20, v/v); DS3b = methanol/water/ammonium hydroxide (80/19.9/0.1, v/v).

Table S3. Extraction efficacies [%] for each stationary phase – desorption solvent combination (SP + DS). *Relative standard deviations [%] given in brackets, n=3, substances arranged by retention order.*

| SP<br>+<br>DS<br>↓                           | substance<br>↓ | fenoterol      | carfedol      | oxycodone      | hydrocodone   | ketamine      | remifentanyl acid | metoprolol     | 6-acetylcodeine | methylphenidate | zolpidem       | cocaine        | LSD            | melatonin      | bisoprolol     | phenylcyclidine | cortisol       | buprenorphine  | alprazolam     | anastrozole    | methadone      | 11-deoxycortisol | boldenone      | clonazepam     | agomelatine    | methandienone  | flunitrazepam  | androstenedione | canrenone      | progesterone   | THC-COOH       |
|----------------------------------------------|----------------|----------------|---------------|----------------|---------------|---------------|-------------------|----------------|-----------------|-----------------|----------------|----------------|----------------|----------------|----------------|-----------------|----------------|----------------|----------------|----------------|----------------|------------------|----------------|----------------|----------------|----------------|----------------|-----------------|----------------|----------------|----------------|
| median extraction efficacy                   |                | 35.3           | 61.2          | 48.1           | 68.8          | 79.0          | 59.3              | 75.5           | 99.6            | 69.3            | 102.5          | 85.5           | 97.7           | 56.7           | 97.8           | 89.0            | 96.4           | 91.6           | 99.9           | 97.7           | 96.7           | 101.9            | 102.3          | 92.3           | 96.5           | 100.8          | 96.9           | 103.4           | 104.4          | 98.6           | 79.5           |
| 3 <sup>rd</sup> quartile extraction efficacy |                | 45.2           | 71.2          | 60.3           | 81.6          | 87.0          | 70.3              | 84.9           | 104.5           | 80.3            | 105.8          | 94.2           | 101.1          | 66.9           | 102.6          | 94.5            | 101.4          | 95.2           | 104.5          | 104.1          | 101.3          | 106.3            | 107.9          | 99.4           | 104.2          | 106.4          | 103.8          | 106.8           | 111.9          | 103.0          | 86.6           |
| top extraction efficacy                      |                | 65.1           | 85.8          | 76.1           | 93.5          | 102.1         | 83.9              | 95.1           | 117.6           | 94.4            | 125.5          | 102.8          | 115.0          | 89.5           | 120.9          | 114.5           | 122.9          | 117.0          | 120.7          | 124.4          | 118.5          | 131.3            | 131.1          | 115.3          | 122.8          | 128.1          | 124.5          | 129.5           | 139.9          | 127.9          | 119.0          |
| 10 µm + DS1a                                 |                | 38.9<br>(8.3)  | 60.2<br>(6.8) | 47.8<br>(7.7)  | 65.6<br>(6.6) | 75.0<br>(4.1) | 59.8<br>(8.2)     | 79.8<br>(3.5)  | 95.5<br>(2.1)   | 68.5<br>(3.9)   | 106.2<br>(2.3) | 83.7<br>(2.9)  | 93.8<br>(2.6)  | 57.6<br>(6.7)  | 104.0<br>(0.9) | 96.8<br>(1.6)   | 105.4<br>(2.7) | 100.0<br>(2.6) | 103.9<br>(2.4) | 104.8<br>(1.8) | 106.9<br>(2.0) | 110.7<br>(1.3)   | 109.7<br>(0.6) | 101.7<br>(1.5) | 104.7<br>(1.0) | 113.0<br>(1.8) | 106.8<br>(1.9) | 111.6<br>(2.4)  | 113.7<br>(3.1) | 111.7<br>(2.1) | 97.7<br>(5.4)  |
| 10 µm polar + DS1a                           |                | 35.7<br>(8.1)  | 55.6<br>(7.4) | 40.4<br>(3.1)  | 66.5<br>(5.0) | 73.5<br>(4.2) | 46.3<br>(4.9)     | 71.2<br>(9.0)  | 89.2<br>(4.6)   | 65.3<br>(7.1)   | 101.7<br>(3.4) | 78.1<br>(5.6)  | 92.9<br>(4.4)  | 50.9<br>(2.4)  | 95.4<br>(4.1)  | 90.5<br>(4.9)   | 97.2<br>(5.1)  | 94.0<br>(2.7)  | 96.4<br>(5.4)  | 94.7<br>(3.6)  | 100.2<br>(3.5) | 106.6<br>(1.9)   | 102.2<br>(4.9) | 87.5<br>(5.6)  | 94.3<br>(3.7)  | 101.3<br>(4.2) | 93.5<br>(3.1)  | 102.5<br>(3.3)  | 105.0<br>(2.7) | 102.2<br>(2.6) | 91.0<br>(1.9)  |
| 5 µm + DS1a                                  |                | 25.5<br>(5.3)  | 40.0<br>(6.9) | 29.4<br>(5.3)  | 45.5<br>(5.3) | 59.4<br>(2.9) | 36.4<br>(6.0)     | 54.0<br>(2.2)  | 82.4<br>(1.1)   | 48.3<br>(4.9)   | 99.2<br>(3.2)  | 67.0<br>(1.7)  | 88.1<br>(2.0)  | 43.7<br>(3.2)  | 89.5<br>(2.6)  | 82.0<br>(2.8)   | 92.3<br>(3.8)  | 90.0<br>(8.7)  | 93.7<br>(3.3)  | 87.2<br>(4.6)  | 99.3<br>(3.3)  | 97.3<br>(4.0)    | 97.9<br>(1.3)  | 83.1<br>(3.8)  | 90.5<br>(3.8)  | 96.6<br>(1.5)  | 90.5<br>(2.9)  | 104.3<br>(2.5)  | 101.5<br>(3.8) | 97.1<br>(9.6)  | 76.0<br>(9.1)  |
| 45 µm + DS1a                                 |                | 60.1<br>(6.8)  | 79.5<br>(6.3) | 72.4<br>(6.5)  | 90.2<br>(3.3) | 94.3<br>(3.5) | 77.4<br>(5.3)     | 89.5<br>(7.9)  | 99.1<br>(3.4)   | 87.8<br>(6.5)   | 102.8<br>(3.4) | 90.3<br>(4.6)  | 100.5<br>(3.1) | 83.5<br>(6.2)  | 102.8<br>(5.2) | 99.2<br>(4.6)   | 106.1<br>(3.2) | 87.9<br>(4.4)  | 104.1<br>(2.7) | 103.8<br>(5.9) | 101.1<br>(3.1) | 101.0<br>(4.0)   | 105.1<br>(2.8) | 103.8<br>(2.8) | 104.1<br>(3.4) | 105.1<br>(1.7) | 104.2<br>(3.6) | 105.8<br>(1.7)  | 103.9<br>(2.3) | 95.8<br>(2.5)  | 71.4<br>(2.4)  |
| 10 µm + DS1n                                 |                | 30.8<br>(8.1)  | 54.5<br>(3.7) | 41.3<br>(6.6)  | 61.2<br>(1.9) | 72.9<br>(2.6) | 53.6<br>(4.5)     | 68.7<br>(4.0)  | 91.9<br>(1.8)   | 63.7<br>(2.0)   | 100.4<br>(0.5) | 83.9<br>(2.8)  | 83.6<br>(2.9)  | 44.8<br>(2.3)  | 94.6<br>(4.5)  | 89.5<br>(4.9)   | 93.2<br>(3.1)  | 95.3<br>(1.5)  | 98.6<br>(2.9)  | 94.2<br>(1.0)  | 100.6<br>(5.9) | 104.9<br>(6.7)   | 100.6<br>(2.2) | 92.0<br>(1.8)  | 94.6<br>(2.0)  | 99.0<br>(2.3)  | 96.6<br>(1.7)  | 101.8<br>(3.1)  | 100.0<br>(3.1) | 100.4<br>(2.1) | 85.9<br>(2.9)  |
| 10 µm polar + DS1n                           |                | 28.5<br>(6.4)  | 49.7<br>(1.3) | 33.3<br>(5.0)  | 58.7<br>(4.7) | 70.3<br>(3.1) | 43.6<br>(7.0)     | 62.1<br>(4.1)  | 86.7<br>(2.4)   | 59.0<br>(3.0)   | 98.1<br>(0.9)  | 75.6<br>(1.9)  | 83.0<br>(4.8)  | 41.0<br>(7.6)  | 90.3<br>(0.7)  | 82.7<br>(2.7)   | 90.5<br>(1.6)  | 93.5<br>(1.5)  | 94.0<br>(0.9)  | 88.4<br>(3.9)  | 96.4<br>(5.3)  | 103.3<br>(7.5)   | 97.4<br>(0.8)  | 84.9<br>(3.7)  | 90.8<br>(0.8)  | 96.6<br>(1.9)  | 90.6<br>(4.1)  | 98.5<br>(3.4)   | 97.5<br>(2.4)  | 95.8<br>(1.4)  | 80.6<br>(5.2)  |
| 5 µm + DS1n                                  |                | 23.1<br>(3.1)  | 39.5<br>(1.7) | 29.3<br>(2.3)  | 43.9<br>(5.2) | 59.4<br>(1.8) | 34.3<br>(6.1)     | 52.4<br>(2.6)  | 77.4<br>(0.8)   | 47.6<br>(3.4)   | 92.2<br>(2.2)  | 67.6<br>(2.0)  | 75.1<br>(5.8)  | 35.1<br>(6.8)  | 80.5<br>(2.5)  | 77.7<br>(4.0)   | 80.1<br>(1.8)  | 84.6<br>(1.4)  | 85.5<br>(3.6)  | 78.8<br>(3.4)  | 92.3<br>(5.0)  | 86.0<br>(3.4)    | 88.2<br>(1.3)  | 73.7<br>(1.2)  | 81.9<br>(0.9)  | 86.8<br>(3.0)  | 83.1<br>(8.1)  | 93.9<br>(1.8)   | 95.1<br>(1.4)  | 89.5<br>(8.5)  | 73.8<br>(5.2)  |
| 45 µm + DS1n                                 |                | 47.8<br>(1.6)  | 71.7<br>(3.7) | 59.5<br>(4.4)  | 81.4<br>(2.3) | 88.7<br>(1.6) | 69.0<br>(0.9)     | 80.9<br>(3.7)  | 95.6<br>(2.2)   | 80.9<br>(3.2)   | 99.7<br>(1.2)  | 91.1<br>(2.5)  | 88.7<br>(0.2)  | 63.7<br>(1.9)  | 96.7<br>(3.1)  | 93.1<br>(4.7)   | 97.2<br>(1.3)  | 81.6<br>(4.8)  | 98.1<br>(1.3)  | 94.7<br>(1.1)  | 97.2<br>(3.9)  | 94.7<br>(4.6)    | 98.1<br>(0.7)  | 94.6<br>(0.5)  | 94.9<br>(1.2)  | 98.6<br>(1.7)  | 96.2<br>(2.2)  | 97.8<br>(1.7)   | 95.4<br>(2.3)  | 88.3<br>(3.8)  | 67.1<br>(2.3)  |
| 10 µm + DS1b                                 |                | 39.8<br>(12.8) | 70.4<br>(8.2) | 60.8<br>(10.1) | 76.0<br>(6.2) | 84.6<br>(4.8) | 68.1<br>(8.4)     | 84.9<br>(7.2)  | 99.6<br>(3.3)   | 79.8<br>(6.5)   | 104.0<br>(4.0) | 95.0<br>(2.8)  | 95.1<br>(4.3)  | 59.6<br>(10.6) | 103.5<br>(1.6) | 101.3<br>(3.6)  | 101.3<br>(4.9) | 98.2<br>(2.3)  | 104.4<br>(3.2) | 101.4<br>(5.1) | 109.2<br>(2.9) | 102.9<br>(6.2)   | 104.9<br>(3.7) | 98.2<br>(5.3)  | 99.7<br>(4.7)  | 100.9<br>(4.6) | 103.5<br>(3.8) | 106.6<br>(2.7)  | 105.8<br>(2.7) | 101.8<br>(1.4) | 80.0<br>(3.6)  |
| 10 µm polar + DS1b                           |                | 27.2<br>(5.4)  | 51.8<br>(9.5) | 39.7<br>(7.9)  | 62.4<br>(5.4) | 77.4<br>(5.4) | 44.4<br>(5.6)     | 66.1<br>(3.4)  | 94.9<br>(0.5)   | 65.1<br>(2.5)   | 103.0<br>(1.1) | 84.7<br>(0.4)  | 94.4<br>(1.2)  | 44.5<br>(4.4)  | 97.7<br>(1.8)  | 96.3<br>(2.3)   | 96.1<br>(4.7)  | 103.1<br>(6.0) | 100.8<br>(5.1) | 94.9<br>(0.7)  | 106.7<br>(4.0) | 100.1<br>(8.2)   | 104.8<br>(3.1) | 87.6<br>(2.4)  | 92.4<br>(1.4)  | 100.1<br>(1.7) | 94.4<br>(2.3)  | 103.3<br>(2.3)  | 105.3<br>(5.0) | 105.5<br>(3.4) | 92.9<br>(13.7) |
| 5 µm + DS1b                                  |                | 34.0<br>(14.1) | 61.0<br>(9.4) | 51.1<br>(11.4) | 65.9<br>(9.0) | 79.0<br>(5.5) | 55.9<br>(8.7)     | 74.8<br>(10.7) | 94.0<br>(2.9)   | 71.0<br>(9.0)   | 100.2<br>(1.8) | 89.3<br>(4.5)  | 93.3<br>(1.9)  | 55.9<br>(9.6)  | 96.8<br>(3.1)  | 94.2<br>(4.2)   | 95.7<br>(4.2)  | 95.2<br>(2.5)  | 97.4<br>(1.7)  | 95.5<br>(1.6)  | 105.1<br>(4.3) | 103.2<br>(2.0)   | 100.2<br>(1.1) | 90.8<br>(1.6)  | 97.5<br>(1.4)  | 101.5<br>(2.5) | 97.1<br>(3.8)  | 105.3<br>(2.1)  | 103.0<br>(1.9) | 100.8<br>(2.5) | 77.0<br>(3.0)  |
| 45 µm + DS1b                                 |                | 53.5<br>(2.5)  | 84.0<br>(2.7) | 76.1<br>(2.3)  | 92.0<br>(0.9) | 98.9<br>(1.1) | 81.2<br>(0.5)     | 90.4<br>(3.2)  | 105.9<br>(2.3)  | 94.3<br>(2.2)   | 106.8<br>(1.2) | 102.8<br>(0.6) | 101.9<br>(1.7) | 77.1<br>(0.6)  | 107.8<br>(2.8) | 105.8<br>(3.4)  | 110.2<br>(1.4) | 92.7<br>(3.0)  | 108.3<br>(3.3) | 106.0<br>(1.7) | 107.3<br>(5.7) | 113.0<br>(2.3)   | 110.3<br>(5.4) | 101.8<br>(2.7) | 109.5<br>(1.3) | 108.3<br>(1.1) | 109.3<br>(2.5) | 107.9<br>(0.9)  | 107.2<br>(6.4) | 98.6<br>(1.7)  | 74.8<br>(3.0)  |
| 10 µm + DS2a                                 |                | 44.8<br>(6.2)  | 69.2<br>(1.5) | 56.6<br>(3.9)  | 75.1<br>(2.2) | 81.9<br>(1.9) | 69.5<br>(4.7)     | 84.2<br>(3.4)  | 100.2<br>(0.5)  | 74.0<br>(1.8)   | 105.0<br>(2.6) | 92.0<br>(1.0)  | 98.5<br>(1.0)  | 64.0<br>(4.5)  | 103.4<br>(1.0) | 92.8<br>(1.2)   | 106.3<br>(1.8) | 97.1<br>(2.9)  | 103.2<br>(1.4) | 106.4<br>(2.9) | 96.4<br>(1.8)  | 110.9<br>(3.1)   | 110.0<br>(4.4) | 102.3<br>(2.1) | 107.0<br>(1.1) | 110.1<br>(1.3) | 107.8<br>(2.0) | 114.4<br>(1.5)  | 111.3<br>(1.3) | 106.4<br>(2.2) | 89.7<br>(1.1)  |
| 10 µm polar + DS2a                           |                | 33.9<br>(6.1)  | 52.5<br>(3.6) | 40.5<br>(5.5)  | 67.4<br>(3.3) | 80.8<br>(1.9) | 46.9<br>(2.0)     | 70.9<br>(5.6)  | 99.4<br>(0.7)   | 66.7<br>(3.8)   | 108.0<br>(2.0) | 85.2<br>(1.9)  | 101.2<br>(1.4) | 52.2<br>(3.4)  | 102.3<br>(1.2) | 93.0<br>(2.2)   | 102.0<br>(5.6) | 96.2<br>(3.3)  | 105.3<br>(3.5) | 105.0<br>(1.3) | 99.8<br>(0.7)  | 110.3<br>(1.2)   | 112.1<br>(1.5) | 97.7<br>(1.1)  | 105.6<br>(1.0) | 113.0<br>(0.6) | 105.1<br>(2.3) | 116.5<br>(1.8)  | 115.5<br>(1.1) | 111.5<br>(1.9) | 96.3<br>(2.6)  |
| 5 µm + DS2a                                  |                | 42.4<br>(10.5) | 61.4<br>(8.5) | 48.4<br>(7.1)  | 67.2<br>(5.9) | 74.2<br>(5.2) | 58.7<br>(7.5)     | 75.4<br>(3.1)  | 90.4<br>(3.1)   | 66.5<br>(8.0)   | 98.5<br>(1.7)  | 83.2<br>(4.7)  | 91.5<br>(3.1)  | 58.9<br>(7.5)  | 95.7<br>(3.6)  | 87.7<br>(4.5)   | 91.8<br>(3.7)  | 87.2<br>(1.1)  | 93.3<br>(3.0)  | 96.3<br>(1.7)  | 94.2<br>(4.4)  | 103.0<br>(4.4)   | 99.2<br>(4.0)  | 88.9<br>(4.0)  | 94.0<br>(3.7)  | 98.4<br>(0.1)  | 95.9<br>(2.4)  | 103.3<br>(2.9)  | 101.9<br>(3.8) | 98.3<br>(0.1)  | 78.4<br>(1.3)  |
| 45 µm + DS2a                                 |                | 59.2<br>(3.8)  | 80.4<br>(3.5) | 71.4<br>(2.1)  | 93.5<br>(2.1) | 93.3<br>(1.0) | 79.8<br>(2.8)     | 91.1<br>(2.5)  | 101.6<br>(2.3)  | 86.0<br>(2.9)   | 103.6<br>(2.6) | 93.0<br>(2.0)  | 99.8<br>(2.3)  | 78.5<br>(5.2)  | 102.6<br>(1.4) | 94.0<br>(2.1)   | 100.8<br>(1.8) | 86.2<br>(1.8)  | 103.3<br>(6.0) | 107.4<br>(3.0) | 95.3<br>(4.0)  | 101.6<br>(5.8)   | 107.3<br>(1.8) | 103.5<br>(1.9) | 104.0<br>(1.9) | 103.9<br>(2.1) | 104.8<br>(2.0) | 104.9<br>(4.4)  | 105.6<br>(4.3) | 94.5<br>(3.4)  | 71.8<br>(3.3)  |
| 10 µm + DS2n                                 |                | 40.2<br>(7.8)  | 65.0<br>(3.0) | 57.7<br>(4.4)  | 77.8<br>(2.7) | 85.8<br>(1.9) | 70.2<br>(4.8)     | 81.7<br>(4.6)  | 102.6<br>(1.9)  | 76.4<br>(3.6)   | 109.2<br>(1.6) | 94.6<br>(4.4)  | 106.8<br>(1.7) | 66.3<br>(3.9)  | 99.4<br>(2.4)  | 85.6<br>(4.8)   | 103.3<br>(3.7) | 94.7<br>(0.4)  | 107.9<br>(2.2) | 105.4<br>(2.3) | 86.8<br>(6.0)  | 105.6<br>(3.0)   | 108.6<br>(1.4) | 100.8<br>(2.5) | 108.2<br>(0.7) | 109.7<br>(2.2) | 103.6<br>(1.8) | 107.6<br>(3.0)  | 107.4<br>(2.0) | 106.9<br>(3.1) | 89.3<br>(3.6)  |
| 10 µm polar + DS2n                           |                | 32.6<br>(5.3)  | 53.7<br>(7.7) | 41.3<br>(5.6)  | 69.1<br>(2.7) | 82.1<br>(0.8) | 51.1<br>(0.9)     | 73.4<br>(6.5)  | 99.7<br>(1.5)   | 67.8<br>(6.7)   | 108.6<br>(2.8) | 85.9<br>(3.7)  | 105.5<br>(2.5) | 52.3<br>(2.3)  | 97.9<br>(4.7)  | 81.9<br>(4.2)   | 99.2<br>(5.0)  | 94.7<br>(1.7)  | 106.3<br>(3.3) | 101.3<br>(2.9) | 87.7<br>(5.0)  | 106.5<br>(2.4)   | 107.7<br>(1.6) | 91.7<br>(0.9)  | 105.5<br>(2.2) | 108.9<br>(2.6) | 101.5<br>(1.8) | 108.7<br>(2.2)  | 110.5<br>(1.4) | 108.9<br>(0.8) | 86.3<br>(1.7)  |
| 5 µm + DS2n                                  |                | 28.6<br>(3.5)  | 49.5<br>(5.6) | 38.1<br>(8.3)  | 58.0<br>(5.9) | 68.1<br>(4.5) | 47.2<br>(6.1)     | 61.3<br>(3.2)  | 87.0<br>(3.2)   | 56.3<br>(5.7)   | 97.9<br>(4.7)  | 77.7<br>(6.9)  | 90.8<br>(5.1)  | 47.4<br>(5.3)  | 87.8<br>(7.5)  | 77.6<br>(6.5)   | 87.8<br>(4.8)  | 82.4<br>(4.4)  | 94.3<br>(3.9)  | 90.4<br>(5.4)  | 84.6<br>(8.2)  | 94.8<br>(4.0)    | 80.1<br>(5.0)  | 91.4<br>(6.1)  | 97.3<br>(5.0)  | 91.1<br>(5.2)  | 101.0<br>(3.0) | 94.7<br>(6.1)   | 92.1<br>(4.1)  | 77.6<br>(3.3)  |                |
| 45 µm + DS2n                                 |                | 53.3<br>(5.7)  | 76.9<br>(3.6) | 64.9<br>(1.9)  | 90.0<br>(0.8) | 93.4<br>(1.6) | 79.1<br>(1.3)     | 85.1<br>(1.5)  | 104.1<br>(0.7)  | 85.8<br>(1.1)   | 105.6<br>(0.7) | 96.5<br>(2.2)  | 104.1<br>(1.3) | 77.3<br>(1.2)  | 96.6<br>(2.7)  | 81.4<br>(3.2)   | 98.2<br>(1.4)  | 86.7<br>(1.4)  | 105.9<br>(3.0) | 102.3<br>(3.1) | 81.6<br>(2.6)  | 103.7<br>(4.5)   | 102.5<br>(2.9) | 99.0<br>(2.2)  | 101.6<br>(3.3) | 105.8<br>(3.2) | 100.7<br>(1.8) | 105.5<br>(2.8)  | 100.0<br>(3.5) | 93.6<br>(0.7)  | 71.2<br>(4.6)  |

| SP<br>+<br>DS<br>↓ | substance<br>↓ | fenoterol  | carteolol   | oxycodone  | hydrocodone | ketamine    | remifentanyl acid | metoprolol  | 6-acetylcodeine | methylphenidate | zolpidem    | cocaine     | LSD         | melatonin   | bisoprolol  | phenylephrine | cortisol    | buprenorphine | alprazolam  | anastrozole | methadone   | 11-deoxycortisol | boldenone   | donazepam   | agomelatine | methandenedione | flunitrazepam | androstenedione | canrenone   | progesterone | THC-COOH |
|--------------------|----------------|------------|-------------|------------|-------------|-------------|-------------------|-------------|-----------------|-----------------|-------------|-------------|-------------|-------------|-------------|---------------|-------------|---------------|-------------|-------------|-------------|------------------|-------------|-------------|-------------|-----------------|---------------|-----------------|-------------|--------------|----------|
| 10 µm + DS2b       | 29.6 (10.9)    | 68.2 (5.5) | 57.7 (7.3)  | 74.6 (6.4) | 84.8 (5.3)  | 68.4 (8.3)  | 84.2 (5.5)        | 100.0 (3.9) | 76.9 (6.3)      | 102.2 (3.7)     | 94.1 (5.6)  | 101.1 (3.3) | 62.8 (6.8)  | 102.7 (4.5) | 92.9 (3.9)  | 97.6 (5.5)    | 92.2 (5.5)  | 102.6 (3.6)   | 99.2 (4.6)  | 97.0 (3.8)  | 102.2 (4.6) | 104.5 (4.1)      | 96.3 (4.4)  | 97.7 (4.6)  | 99.5 (5.2)  | 101.0 (4.9)     | 102.6 (5.2)   | 102.0 (3.0)     | 97.0 (3.8)  | 79.1 (2.3)   |          |
| 10 µm polar + DS2b | 21.9 (3.0)     | 52.0 (5.1) | 37.8 (4.1)  | 62.2 (2.5) | 73.7 (4.0)  | 46.0 (2.7)  | 69.3 (5.2)        | 88.3 (3.0)  | 62.0 (4.7)      | 97.2 (3.7)      | 81.6 (5.5)  | 94.7 (3.0)  | 48.0 (4.5)  | 93.2 (3.5)  | 82.3 (4.3)  | 94.1 (4.5)    | 83.5 (5.4)  | 94.4 (1.9)    | 89.9 (3.4)  | 90.8 (5.0)  | 95.8 (1.7)  | 99.3 (5.5)       | 82.4 (2.1)  | 95.2 (4.2)  | 98.0 (1.8)  | 91.1 (2.6)      | 96.0 (2.7)    | 96.1 (4.4)      | 96.3 (7.9)  | 77.0 (6.5)   |          |
| 5 µm + DS2b        | 23.9 (10.9)    | 51.7 (5.6) | 39.6 (4.0)  | 58.3 (5.8) | 72.2 (3.4)  | 48.5 (8.0)  | 68.4 (6.3)        | 90.5 (1.6)  | 59.5 (4.0)      | 100.1 (2.2)     | 82.3 (1.2)  | 97.2 (2.0)  | 51.4 (6.9)  | 93.7 (2.2)  | 86.0 (1.5)  | 95.0 (0.8)    | 90.9 (4.5)  | 98.3 (1.6)    | 93.6 (0.4)  | 98.7 (2.8)  | 106.2 (6.9) | 100.8 (3.2)      | 87.5 (1.4)  | 95.5 (0.9)  | 101.0 (2.0) | 93.7 (1.1)      | 103.4 (1.1)   | 102.5 (1.0)     | 98.8 (3.2)  | 79.8 (2.0)   |          |
| 45 µm + DS2b       | 35.0 (6.5)     | 76.0 (8.1) | 68.3 (8.0)  | 87.1 (9.3) | 93.5 (2.8)  | 77.0 (4.0)  | 88.7 (3.1)        | 99.9 (1.6)  | 84.9 (5.1)      | 100.8 (1.9)     | 96.0 (3.5)  | 102.2 (0.6) | 75.7 (5.7)  | 98.5 (3.9)  | 86.8 (4.2)  | 96.8 (0.5)    | 83.6 (1.3)  | 101.5 (1.1)   | 100.7 (2.0) | 89.3 (3.0)  | 98.3 (0.9)  | 101.4 (2.8)      | 97.3 (2.7)  | 101.5 (0.4) | 100.6 (2.2) | 99.7 (1.2)      | 100.8 (1.9)   | 98.1 (4.3)      | 91.9 (2.8)  | 70.3 (4.3)   |          |
| 10 µm + DS3a       | 40.5 (9.1)     | 63.6 (8.5) | 47.0 (8.8)  | 68.5 (5.7) | 79.1 (5.7)  | 61.5 (5.7)  | 82.5 (6.5)        | 100.8 (5.3) | 71.7 (7.4)      | 113.7 (3.1)     | 91.2 (4.4)  | 100.9 (2.1) | 59.1 (9.6)  | 109.4 (3.6) | 103.7 (3.9) | 112.8 (1.4)   | 105.9 (2.6) | 109.8 (6.1)   | 112.3 (4.2) | 110.0 (4.6) | 116.2 (2.5) | 117.5 (4.4)      | 105.7 (3.5) | 113.5 (4.2) | 115.7 (2.3) | 113.0 (3.2)     | 119.9 (2.4)   | 120.3 (1.4)     | 116.2 (0.9) | 106.4 (0.9)  |          |
| 10 µm polar + DS3a | 48.0 (6.7)     | 71.0 (3.2) | 52.4 (8.2)  | 82.4 (3.4) | 97.8 (1.8)  | 63.7 (4.4)  | 90.2 (2.9)        | 112.5 (2.1) | 85.7 (1.4)      | 125.5 (2.5)     | 102.4 (0.6) | 115.0 (4.4) | 69.1 (4.8)  | 120.9 (3.2) | 114.5 (2.4) | 122.9 (5.2)   | 117.0 (4.1) | 120.7 (4.7)   | 124.4 (1.6) | 118.5 (4.3) | 131.3 (7.4) | 131.1 (2.7)      | 115.3 (1.3) | 122.8 (3.5) | 128.1 (3.0) | 124.5 (2.2)     | 129.5 (2.9)   | 131.5 (4.5)     | 127.9 (4.8) | 119.0 (4.3)  |          |
| 5 µm + DS3a        | 32.4 (8.5)     | 49.4 (4.6) | 36.3 (5.4)  | 50.3 (6.6) | 67.8 (4.9)  | 45.4 (9.1)  | 62.1 (3.8)        | 79.9 (1.3)  | 55.6 (6.3)      | 95.3 (1.5)      | 70.5 (3.8)  | 82.2 (2.3)  | 50.9 (6.8)  | 89.5 (2.6)  | 82.3 (2.6)  | 91.0 (2.2)    | 86.6 (3.4)  | 90.3 (4.8)    | 92.5 (2.6)  | 90.0 (0.8)  | 101.1 (2.7) | 96.9 (2.4)       | 85.9 (3.9)  | 93.5 (3.2)  | 97.8 (1.0)  | 92.6 (3.5)      | 100.2 (1.9)   | 102.8 (5.4)     | 98.5 (4.4)  | 78.9 (6.9)   |          |
| 45 µm + DS3a       | 65.1 (2.2)     | 85.8 (3.0) | 76.1 (3.5)  | 92.3 (2.6) | 102.1 (1.9) | 83.9 (1.8)  | 95.1 (3.3)        | 105.7 (0.2) | 94.4 (1.6)      | 109.9 (0.6)     | 100.0 (1.3) | 105.5 (0.7) | 89.5 (2.4)  | 108.6 (0.7) | 104.7 (1.3) | 110.7 (2.3)   | 92.2 (2.4)  | 105.1 (0.8)   | 116.7 (1.5) | 103.4 (1.3) | 119.1 (0.4) | 114.0 (2.2)      | 108.9 (1.8) | 113.3 (1.7) | 113.1 (0.3) | 112.4 (0.4)     | 114.4 (2.7)   | 114.0 (3.8)     | 107.8 (2.8) | 83.2 (9.0)   |          |
| 10 µm + DS3n       | 35.6 (12.1)    | 52.8 (9.6) | 41.0 (11.3) | 69.1 (8.1) | 71.6 (6.4)  | 62.0 (10.9) | 64.9 (4.3)        | 108.2 (1.7) | 55.4 (8.4)      | 107.4 (2.4)     | 71.2 (5.3)  | 100.3 (1.4) | 38.8 (12.3) | 98.2 (2.1)  | 78.0 (2.1)  | 74.7 (1.6)    | 95.5 (3.6)  | 99.0 (2.7)    | 99.4 (3.4)  | 90.9 (6.1)  | 85.0 (2.8)  | 108.7 (2.7)      | 90.5 (3.4)  | 76.8 (2.1)  | 94.6 (3.5)  | 86.0 (3.7)      | 103.8 (2.6)   | 139.9 (1.9)     | 99.9 (2.1)  | 84.0 (4.3)   |          |
| 10 µm polar + DS3n | 29.6 (6.2)     | 43.9 (2.3) | 32.6 (6.4)  | 65.8 (4.3) | 68.5 (6.1)  | 45.8 (8.7)  | 56.9 (3.5)        | 102.9 (3.5) | 53.1 (5.2)      | 105.4 (1.8)     | 66.2 (2.1)  | 99.6 (2.9)  | 32.6 (6.2)  | 94.7 (1.2)  | 75.1 (1.4)  | 69.9 (3.8)    | 89.2 (4.1)  | 93.8 (3.8)    | 90.2 (3.8)  | 91.7 (7.9)  | 83.6 (5.7)  | 102.4 (0.8)      | 83.0 (3.7)  | 71.8 (2.5)  | 91.7 (2.7)  | 81.0 (2.1)      | 100.0 (1.9)   | 133.7 (4.1)     | 95.7 (2.8)  | 76.0 (2.4)   |          |
| 5 µm + DS3n        | 32.2 (3.7)     | 43.8 (5.0) | 34.1 (3.6)  | 57.8 (1.8) | 60.6 (0.8)  | 49.6 (3.0)  | 54.9 (4.3)        | 87.9 (1.5)  | 47.4 (4.3)      | 89.4 (1.3)      | 58.9 (3.7)  | 86.6 (2.8)  | 34.7 (1.7)  | 82.0 (4.1)  | 63.3 (5.8)  | 62.4 (2.3)    | 77.0 (3.3)  | 79.5 (1.1)    | 81.5 (1.5)  | 76.4 (6.9)  | 71.2 (2.7)  | 89.3 (2.6)       | 73.6 (3.7)  | 63.2 (2.1)  | 78.0 (3.0)  | 72.2 (1.2)      | 87.8 (2.2)    | 117.8 (2.6)     | 85.7 (1.9)  | 68.4 (2.2)   |          |
| 45 µm + DS3n       | 54.9 (1.5)     | 68.2 (4.2) | 61.2 (4.5)  | 92.3 (3.7) | 82.3 (3.2)  | 79.8 (3.1)  | 75.6 (4.5)        | 110.5 (3.8) | 70.1 (2.2)      | 103.8 (2.4)     | 75.9 (2.6)  | 102.4 (3.1) | 54.5 (2.2)  | 97.9 (2.1)  | 78.5 (2.1)  | 74.0 (4.1)    | 83.5 (2.2)  | 93.2 (3.0)    | 97.3 (2.9)  | 90.1 (4.1)  | 84.3 (3.5)  | 103.0 (4.0)      | 92.5 (3.1)  | 74.6 (1.6)  | 87.7 (3.0)  | 84.8 (2.6)      | 98.8 (1.8)    | 131.7 (4.1)     | 94.1 (2.1)  | 75.4 (3.0)   |          |
| 10 µm + DS3b       | 43.9 (6.1)     | 71.8 (6.3) | 60.1 (5.7)  | 79.0 (3.0) | 86.5 (4.8)  | 70.3 (6.2)  | 87.5 (3.1)        | 117.6 (5.7) | 80.1 (4.8)      | 103.0 (3.8)     | 97.6 (6.0)  | 98.2 (4.2)  | 68.7 (6.9)  | 99.9 (4.9)  | 95.4 (5.9)  | 97.1 (0.7)    | 93.1 (3.9)  | 101.9 (3.8)   | 100.7 (2.5) | 101.9 (4.4) | 98.8 (4.7)  | 101.3 (4.3)      | 96.8 (4.5)  | 101.6 (3.6) | 103.3 (5.0) | 101.6 (3.9)     | 104.4 (3.7)   | 105.4 (2.8)     | 101.2 (4.8) | 83.7 (5.9)   |          |
| 10 µm polar + DS3b | 27.6 (1.6)     | 50.6 (7.4) | 37.0 (8.5)  | 61.0 (4.7) | 72.8 (6.3)  | 43.6 (6.9)  | 64.4 (7.4)        | 109.9 (1.5) | 62.3 (5.4)      | 97.7 (1.3)      | 82.3 (5.8)  | 92.5 (1.1)  | 44.8 (7.6)  | 92.0 (3.9)  | 84.9 (3.4)  | 86.7 (0.6)    | 90.9 (2.4)  | 94.3 (0.6)    | 89.5 (1.8)  | 96.7 (3.9)  | 92.9 (2.3)  | 94.0 (0.6)       | 83.2 (3.4)  | 92.2 (2.5)  | 95.1 (3.0)  | 91.6 (2.7)      | 97.1 (1.5)    | 100.6 (2.4)     | 96.0 (2.2)  | 87.5 (3.0)   |          |
| 5 µm + DS3b        | 34.3 (1.9)     | 61.8 (4.3) | 49.0 (4.3)  | 69.7 (5.4) | 77.5 (3.2)  | 58.3 (5.1)  | 78.7 (4.1)        | 108.7 (1.8) | 70.4 (4.0)      | 99.8 (3.0)      | 89.5 (3.4)  | 95.4 (3.2)  | 59.6 (1.7)  | 96.3 (3.4)  | 88.5 (6.0)  | 92.4 (2.3)    | 87.7 (6.7)  | 98.8 (0.6)    | 94.1 (2.6)  | 96.6 (5.5)  | 96.5 (5.6)  | 98.0 (2.8)       | 89.5 (2.9)  | 94.4 (2.0)  | 100.8 (2.7) | 95.8 (1.9)      | 99.0 (2.2)    | 101.3 (4.4)     | 99.8 (5.0)  | 81.9 (9.0)   |          |
| 45 µm + DS3b       | 46.6 (5.1)     | 76.4 (4.0) | 66.5 (2.8)  | 89.8 (1.4) | 90.6 (2.0)  | 73.9 (2.3)  | 86.7 (2.7)        | 108.5 (2.7) | 84.8 (2.6)      | 101.0 (1.4)     | 96.1 (0.8)  | 99.5 (1.4)  | 74.1 (4.0)  | 99.4 (3.1)  | 89.9 (2.0)  | 93.8 (0.3)    | 82.5 (4.7)  | 104.8 (1.1)   | 98.1 (0.8)  | 95.8 (3.5)  | 97.8 (6.3)  | 98.8 (2.1)       | 95.1 (0.8)  | 99.2 (1.0)  | 101.8 (1.0) | 100.3 (1.0)     | 101.8 (0.8)   | 100.8 (2.1)     | 94.3 (2.0)  | 74.1 (2.6)   |          |

Desorption solvents compositions: DS1a = isopropanol/water/formic acid (80/19.9/0.1, v/v); DS1n = isopropanol/water (80/20, v/v); DS1b = isopropanol/water/ammonium hydroxide (80/19.9/0.1, v/v); DS2a = acetonitrile/water/formic acid (80/19.9/0.1, v/v); DS2n = acetonitrile/water (80/20, v/v); DS2b = acetonitrile/water/ammonium hydroxide (80/19.9/0.1, v/v); DS3a = methanol/water/formic acid (80/19.9/0.1, v/v); DS3n = methanol/water (80/20, v/v); DS3b = methanol/water/ammonium hydroxide (80/19.9/0.1, v/v).

Table S4. Essential physicochemical proprieties of the analysed substances. *Substances arranged by retention order.*

| substance         | monoisotopic mass<br>[Da] [PubChem 2.1] <sup>1</sup> | logP<br>[XLogP3.0] <sup>1</sup> | logP<br>[ALOGPS] <sup>2,3</sup> | logP<br>[ChemAxon] <sup>2,3</sup> | logP<br>[ACD/Labs] <sup>4</sup> | logD pH=7.4<br>[ACD/Labs] <sup>4</sup> | polar surface area [Å <sup>2</sup> ]<br>[Cactvs 3.4.6.11] <sup>1</sup> | polar surface area [Å <sup>2</sup> ]<br>[ChemAxon] <sup>2,3</sup> | polar surface area [Å <sup>2</sup> ]<br>[ACD/Labs] <sup>4</sup> | polarizability [Å <sup>3</sup> ]<br>[ChemAxon] <sup>2,3</sup> | polarizability [Å <sup>3</sup> ]<br>[ACD/LABS] <sup>4</sup> | pKa (strongest acidic)<br>[ChemAxon] <sup>2,3</sup> | pKa (strongest basic)<br>[ChemAxon] <sup>2,3</sup> | H acceptors<br>[Cactvs 3.4.6.11] <sup>1</sup> | H donors<br>[Cactvs 3.4.6.11] <sup>1</sup> | H acceptors<br>[ChemAxon] <sup>2,3</sup> | H donors<br>[ChemAxon] <sup>2,3</sup> | H acceptors<br>[ACD/Labs] <sup>4</sup> | H donors<br>[ACD/Labs] <sup>4</sup> |
|-------------------|------------------------------------------------------|---------------------------------|---------------------------------|-----------------------------------|---------------------------------|----------------------------------------|------------------------------------------------------------------------|-------------------------------------------------------------------|-----------------------------------------------------------------|---------------------------------------------------------------|-------------------------------------------------------------|-----------------------------------------------------|----------------------------------------------------|-----------------------------------------------|--------------------------------------------|------------------------------------------|---------------------------------------|----------------------------------------|-------------------------------------|
| fenoterol         | 303.147058                                           | 2.0                             | 1.36                            | 1.47                              | 0.89                            | -0.45                                  | 93.0                                                                   | 92.95                                                             | 93                                                              | 31.75                                                         | 33.7                                                        | 8.85                                                | 9.63                                               | 5                                             | 5                                          | 5                                        | 5                                     | 5                                      | 5                                   |
| carteolol         | 292.178693                                           | 1.0                             | 1.05                            | 1.42                              | 1.35                            | -0.24                                  | 70.6                                                                   | 70.59                                                             | 71                                                              | 32.79                                                         | 32.3                                                        | 13.41                                               | 9.76                                               | 4                                             | 3                                          | 4                                        | 3                                     | 5                                      | 3                                   |
| oxycodone         | 315.147058                                           | 1.2                             | 1.04                            | 1.03                              | 1.67                            | 0.45                                   | 59.0                                                                   | 59.00                                                             | 59                                                              | 32.79                                                         | 33.0                                                        | 13.57                                               | 8.77                                               | 5                                             | 1                                          | 5                                        | 1                                     | 5                                      | 1                                   |
| hydrocodone       | 299.152144                                           | 2.2                             | 2.13                            | 1.96                              | 1.83                            | 0.17                                   | 38.8                                                                   | 38.77                                                             | 39                                                              | 32.05                                                         | 32.3                                                        | 18.00                                               | 8.61                                               | 4                                             | 0                                          | 4                                        | 0                                     | 4                                      | 0                                   |
| ketamine          | 237.092042                                           | 2.2                             | 2.69                            | 3.35                              | 2.18                            | 2.07                                   | 29.1                                                                   | 29.10                                                             | 29                                                              | 24.97                                                         | 26.1                                                        | 18.78                                               | 7.45                                               | 2                                             | 1                                          | 2                                        | 1                                     | 2                                      | 1                                   |
| remifentanyl acid | 362.184172                                           | -0.7                            | N/A                             | N/A                               | 1.58                            | -1.14                                  | 87.2                                                                   | N/A                                                               | 87                                                              | N/A                                                           | 38.1                                                        | N/A                                                 | N/A                                                | 6                                             | 1                                          | N/A                                      | N/A                                   | 7                                      | 1                                   |
| metoprolol        | 267.183444                                           | 1.9                             | 1.80                            | 1.76                              | 1.79                            | -0.25                                  | 50.7                                                                   | 50.72                                                             | 51                                                              | 31.90                                                         | 30.6                                                        | 14.09                                               | 9.67                                               | 4                                             | 2                                          | 4                                        | 2                                     | 4                                      | 2                                   |
| 6-acetylcodeine   | 341.162708                                           | 1.7                             | N/A                             | N/A                               | 2.09                            | 1.12                                   | 48.0                                                                   | N/A                                                               | 48                                                              | N/A                                                           | 36.6                                                        | N/A                                                 | N/A                                                | 5                                             | 0                                          | N/A                                      | N/A                                   | 5                                      | 0                                   |
| methylphenidate   | 233.141579                                           | 0.2                             | 1.47                            | 2.25                              | 2.55                            | 0.26                                   | 38.3                                                                   | 38.33                                                             | 38                                                              | 26.21                                                         | 26.4                                                        | N/A                                                 | 9.09                                               | 3                                             | 1                                          | 2                                        | 1                                     | 3                                      | 1                                   |
| zolpidem          | 307.168462                                           | 2.5                             | 3.15                            | 3.02                              | 3.07                            | 3.06                                   | 37.6                                                                   | 37.61                                                             | 38                                                              | 35.06                                                         | 37.1                                                        | N/A                                                 | 5.65                                               | 2                                             | 0                                          | 2                                        | 0                                     | 4                                      | 0                                   |
| cocaine           | 303.147058                                           | 2.3                             | 1.97                            | 2.28                              | 3.08                            | 1.22                                   | 55.8                                                                   | 55.84                                                             | 56                                                              | 32.36                                                         | 32.2                                                        | N/A                                                 | 8.85                                               | 5                                             | 0                                          | 3                                        | 0                                     | 5                                      | 0                                   |
| LSD               | 323.199762                                           | 3.0                             | 3.30                            | 2.28                              | 2.74                            | 2.60                                   | 39.3                                                                   | 39.34                                                             | 39                                                              | 37.54                                                         | 38.5                                                        | 17.02                                               | 7.98                                               | 2                                             | 1                                          | 2                                        | 1                                     | 4                                      | 1                                   |
| melatonin         | 232.121178                                           | 0.8                             | 1.42                            | 1.15                              | 0.96                            | 1.74                                   | 54.1                                                                   | 54.12                                                             | 54                                                              | 25.65                                                         | 26.8                                                        | 15.80                                               | -1.60                                              | 2                                             | 2                                          | 2                                        | 2                                     | 4                                      | 2                                   |
| bisoprolol        | 325.225308                                           | 1.9                             | 2.30                            | 2.20                              | 2.14                            | 0.12                                   | 60.0                                                                   | 59.95                                                             | 60                                                              | 38.50                                                         | 36.7                                                        | 14.09                                               | 9.67                                               | 5                                             | 2                                          | 5                                        | 2                                     | 5                                      | 2                                   |
| phencyclidine     | 243.198700                                           | 3.6                             | 5.31                            | 4.49                              | 4.89                            | 3.66                                   | 3.2                                                                    | 3.24                                                              | 3                                                               | 29.66                                                         | 30.4                                                        | N/A                                                 | 10.56                                              | 1                                             | 0                                          | 1                                        | 0                                     | 1                                      | 0                                   |
| cortisol          | 362.209324                                           | 1.6                             | 1.79                            | 1.28                              | 1.43                            | 1.66                                   | 94.8                                                                   | 94.83                                                             | 95                                                              | 39.45                                                         | 37.9                                                        | 12.59                                               | -2.80                                              | 5                                             | 3                                          | 5                                        | 3                                     | 5                                      | 3                                   |
| buprenorphine     | 467.303559                                           | 5.0                             | 4.53                            | 3.55                              | 3.43                            | 3.48                                   | 62.2                                                                   | 62.16                                                             | 62                                                              | 53.11                                                         | 52.1                                                        | 7.50                                                | 12.54                                              | 5                                             | 2                                          | 5                                        | 2                                     | 5                                      | 2                                   |
| alprazolam        | 308.082874                                           | 2.1                             | 2.23                            | 2.37                              | 2.50                            | 2.63                                   | 43.1                                                                   | 43.07                                                             | 43                                                              | 32.22                                                         | 35.0                                                        | 18.30                                               | 5.08                                               | 3                                             | 0                                          | 3                                        | 0                                     | 4                                      | 0                                   |
| anastrozole       | 293.164046                                           | 2.1                             | 2.31                            | 3.03                              | 0.97                            | 2.68                                   | 78.3                                                                   | 78.29                                                             | 78                                                              | 31.97                                                         | 35.7                                                        | N/A                                                 | 2.00                                               | 4                                             | 0                                          | 4                                        | 0                                     | 5                                      | 0                                   |
| methadone         | 309.209264                                           | 3.9                             | 4.14                            | 5.01                              | 4.20                            | 2.80                                   | 20.3                                                                   | 20.31                                                             | 20                                                              | 36.28                                                         | 38.0                                                        | 19.79                                               | 9.12                                               | 2                                             | 0                                          | 2                                        | 0                                     | 2                                      | 0                                   |
| 11-deoxycortisol  | 346.214409                                           | 2.5                             | 2.97                            | 2.58                              | 2.74                            | 2.67                                   | 74.6                                                                   | 74.60                                                             | 75                                                              | 38.86                                                         | 37.3                                                        | 12.59                                               | -3.30                                              | 4                                             | 2                                          | 4                                        | 2                                     | 4                                      | 2                                   |
| boldenone         | 286.193280                                           | 3.5                             | 3.08                            | 3.36                              | 3.50                            | 3.31                                   | 37.3                                                                   | 37.30                                                             | 37                                                              | 33.26                                                         | 32.9                                                        | 18.86                                               | -0.88                                              | 2                                             | 1                                          | 2                                        | 1                                     | 2                                      | 1                                   |
| clonazepam        | 315.041069                                           | 2.4                             | 2.76                            | 3.15                              | 2.34                            | 2.53                                   | 87.3                                                                   | 87.28                                                             | 87                                                              | 29.59                                                         | 32.2                                                        | 11.89                                               | 1.86                                               | 4                                             | 1                                          | 4                                        | 1                                     | 6                                      | 1                                   |
| agomelatine       | 243.125929                                           | 2.7                             | 2.83                            | 2.04                              | 2.27                            | 3.02                                   | 38.3                                                                   | 38.33                                                             | 38                                                              | 27.18                                                         | 29.0                                                        | 15.96                                               | -0.94                                              | 2                                             | 1                                          | 2                                        | 1                                     | 3                                      | 1                                   |
| methandienone     | 300.208930                                           | 3.6                             | 3.55                            | 3.64                              | 4.04                            | 3.76                                   | 37.3                                                                   | 37.30                                                             | 37                                                              | 35.09                                                         | 34.8                                                        | 18.86                                               | -0.53                                              | 2                                             | 1                                          | 2                                        | 1                                     | 2                                      | 1                                   |
| flunitrazepam     | 313.086269                                           | 2.1                             | 2.20                            | 2.55                              | 1.44                            | 2.03                                   | 78.5                                                                   | 78.49                                                             | 78                                                              | 29.60                                                         | 32.4                                                        | N/A                                                 | 1.70                                               | 5                                             | 0                                          | 4                                        | 0                                     | 6                                      | 0                                   |
| androstenedione   | 286.193280                                           | 2.7                             | 2.93                            | 3.93                              | 2.90                            | 2.90                                   | 34.1                                                                   | 34.14                                                             | 34                                                              | 33.20                                                         | 32.4                                                        | 19.03                                               | -4.80                                              | 2                                             | 0                                          | 2                                        | 0                                     | 2                                      | 0                                   |
| canrenone         | 340.203845                                           | 2.7                             | 2.79                            | 3.60                              | 2.99                            | 2.50                                   | 43.4                                                                   | 43.37                                                             | 43                                                              | 38.67                                                         | 37.8                                                        | N/A                                                 | -4.80                                              | 3                                             | 0                                          | 2                                        | 0                                     | 3                                      | 0                                   |
| progesterone      | 314.224580                                           | 3.9                             | 3.58                            | 4.15                              | 4.04                            | 3.72                                   | 34.1                                                                   | 34.14                                                             | 34                                                              | 37.26                                                         | 36.1                                                        | 18.47                                               | -4.80                                              | 2                                             | 0                                          | 2                                        | 0                                     | 2                                      | 0                                   |
| THC-COOH          | 344.198759                                           | 6.3                             | 5.24                            | 5.14                              | 6.21                            | 3.07                                   | 66.8                                                                   | 66.76                                                             | 67                                                              | 39.41                                                         | 38.4                                                        | 4.21                                                | -4.90                                              | 4                                             | 2                                          | 4                                        | 2                                     | 4                                      | 2                                   |

## References:

- 1 PubChem database, <https://pubchem.ncbi.nlm.nih.gov/>, (accessed March 31, 2021).
- 2 DrugBank database, <https://www.drugbank.com/>, (accessed March 31, 2021).
- 3 The Human Metabolome Database, <https://hmdb.ca/>, (accessed March 31, 2021).
- 4 ChemSpider database, <http://www.chemspider.com/>, (accessed March 31, 2021).

Table S5. List of reference standards in alphabetical order.

| substance                                  | reference standard                   | grade                               | manufacturer              |
|--------------------------------------------|--------------------------------------|-------------------------------------|---------------------------|
| (-)-11-nor-9-carboxy-delta9-THC (THC-COOH) | MeOH solution 1 mg/mL                | CRM (primary standard)              | LGC                       |
| 6-acetylcodeine                            | ACN solution 1 mg/mL                 | CRM (primary standard)              | Cerillant                 |
| 11-deoxycortisol                           | MeOH solution 1 mg/mL                | CRM (primary standard)              | Cerillant                 |
| agomelatine                                | MeOH solution from powder 1 mg/mL    | N/A                                 | TRC                       |
| alprazolam                                 | MeOH solution 1 mg/mL                | CRM (primary standard)              | LGC                       |
| anastrozole                                | MeOH solution from powder 1 mg/mL    | reference standard (100%)           | LGC                       |
| androstenedione                            | ACN solution 1 mg/mL                 | CRM (primary standard)              | Cerillant                 |
| bisoprolol                                 | MeOH solution 1 mg/mL                | CRM (primary standard)              | LGC                       |
| boldenone                                  | MeOH solution from powder 1 mg/mL    | analytical standard ( $\geq 98\%$ ) | VETRANAL™ (Sigma-Aldrich) |
| buprenorphine                              | MeOH solution 1 mg/mL                | CRM (primary standard)              | Cerillant                 |
| canrenone                                  | MeOH solution from powder 1 mg/mL    | HPLC ( $\geq 97\%$ )                | Sigma                     |
| carteolol                                  | MeOH solution from powder 1 mg/mL    | USP reference standard (100%)       | USP                       |
| clonazepam                                 | MeOH solution 1 mg/mL                | CRM (primary standard)              | Cerillant                 |
| cocaine                                    | ACN solution 1 mg/mL                 | CRM (primary standard)              | LGC                       |
| cortisol                                   | MeOH solution from powder 1 mg/mL    | N/A                                 | N/A                       |
| fenoterol                                  | MeOH solution from powder 1 mg/mL    | reference standard (99.9%)          | LGC                       |
| flunitrazepam                              | MeOH solution 1 mg/mL                | CRM (primary standard)              | LGC                       |
| hydrocodone                                | MeOH solution 1 mg/mL                | CRM (primary standard)              | Cerillant                 |
| ketamine                                   | MeOH solution 1 mg/mL                | CRM (primary standard)              | LGC                       |
| lysergic acid diethylamide (LSD)           | ACN solution 1 mg/mL                 | CRM (primary standard)              | LGC                       |
| melatonin                                  | MeOH solution from powder 1 mg/mL    | TLC ( $\geq 98\%$ )                 | Sigma                     |
| methandienone                              | 1,2-dimethoxyethane solution 1 mg/mL | CRM (primary standard)              | Cerillant                 |
| methadone                                  | MeOH solution 1 mg/mL                | CRM (primary standard)              | Cerillant                 |

|                                                                              |                                   |                        |           |
|------------------------------------------------------------------------------|-----------------------------------|------------------------|-----------|
| methylphenidate                                                              | MeOH solution 1 mg/mL             | CRM (primary standard) | LGC       |
| metoprolol                                                                   | MeOH solution 1 mg/mL             | CRM (primary standard) | LGC       |
| oxycodone                                                                    | MeOH solution 1 mg/mL             | CRM (primary standard) | LGC       |
| phencyclidine                                                                | MeOH solution 1 mg/mL             | CRM (primary standard) | LGC       |
| progesterone                                                                 | MeOH solution from powder 1 mg/mL | N/A                    | N/A       |
| remifentanil acid                                                            | ACN solution 100 µg/mL            | CRM (primary standard) | Cerillant |
| zolpidem                                                                     | MeOH solution 1 mg/mL             | CRM (primary standard) | LGC       |
| deuterium-labelled internal standards                                        |                                   |                        |           |
| alprazolam D <sub>5</sub>                                                    | MeOH solution 100 µg/mL           | CRM (primary standard) | Cerillant |
| cocaine D <sub>3</sub>                                                       | ACN solution 100 µg/mL            | CRM (primary standard) | Cerillant |
| oxycodone D <sub>3</sub>                                                     | MeOH solution 100 µg/mL           | CRM (primary standard) | Cerillant |
| (-)-11-nor-9-carboxy-delta9-THC D <sub>3</sub><br>(THC-COOH D <sub>3</sub> ) | MeOH solution 100 µg/mL           | CRM (primary standard) | Cerillant |



Table S6. Monitored precursor – product ion(s) transitions. *Substances arranged by retention order.*

| substance                 | retention time<br>[min] | precursor ion<br>[m/z] | product ions [m/z]: |        |        |
|---------------------------|-------------------------|------------------------|---------------------|--------|--------|
|                           |                         |                        | 1                   | 2      | 3      |
| fenoterol                 | 4.156                   | 304.00                 | 107.15              | 135.15 | 286.10 |
| carteolol                 | 4.499                   | 293.00                 | 237.15              | 202.15 | 74.10  |
| oxycodone D <sub>3</sub>  | 4.532                   | 319.00                 | 301.20              | 244.10 | 259.20 |
| oxycodone                 | 4.567                   | 316.10                 | 298.20              | 241.20 | 256.10 |
| hydrocodone               | 4.914                   | 300.00                 | 199.15              | 171.10 | 128.15 |
| ketamine                  | 5.711                   | 237.90                 | 125.05              | 220.10 | 207.15 |
| remifentanyl acid         | 6.755                   | 363.00                 | 113.10              | 146.20 | 214.15 |
| metoprolol                | 6.499                   | 267.90                 | 116.15              | 74.15  | 72.10  |
| 6-acetylcodeine           | 6.911                   | 342.00                 | 225.15              | 165.15 | 197.20 |
| methylphenidate           | 6.765                   | 234.00                 | 84.15               | 56.10  | 91.10  |
| zolpidem                  | 7.537                   | 307.90                 | 235.15              | 236.20 | 263.20 |
| cocaine                   | 7.501                   | 303.90                 | 182.20              | 82.10  | 105.10 |
| cocaine D <sub>3</sub>    | 7.503                   | 307.00                 | 185.20              | 77.10  | 85.20  |
| LSD                       | 7.844                   | 323.90                 | 223.20              | 208.15 | 207.10 |
| melatonin                 | 8.048                   | 232.90                 | 174.20              | 130.15 | 159.10 |
| bisoprolol                | 8.018                   | 326.20                 | 116.20              | 74.05  | 72.10  |
| phencyclidine             | 8.828                   | 244.00                 | 91.05               | 86.10  | 159.20 |
| cortisol                  | 9.490                   | 363.20                 | 121.00              | 327.20 | 105.00 |
| buprenorphine             | 9.891                   | 468.10                 | 55.15               | 396.25 | 414.25 |
| alprazolam D <sub>5</sub> | 11.420                  | 314.10                 | 210.20              | 286.10 | 279.25 |
| alprazolam                | 11.484                  | 308.90                 | 205.15              | 281.15 | 274.10 |
| anastrozole               | 11.506                  | 294.00                 | 225.20              | 210.20 | 115.05 |
| methadone                 | 11.622                  | 310.00                 | 265.15              | 105.10 | 77.05  |
| 11-deoxycortisol          | 11.617                  | 347.15                 | 97.10               | 109.05 | 79.05  |
| boldenone                 | 12.042                  | 287.00                 | 121.20              | 135.20 | 77.15  |
| clonazepam                | 12.062                  | 316.00                 | 270.10              | 214.05 | 207.15 |
| agomelatine               | 12.210                  | 244.00                 | 185.20              | 170.10 | 141.10 |
| methandienone             | 12.691                  | 301.20                 | 121.05              | 149.25 | 77.00  |
| flunitrazepam             | 12.851                  | 313.90                 | 268.15              | 239.10 | 183.10 |
| androstenedione           | 14.570                  | 287.30                 | 97.05               | 109.05 | 78.95  |
| canrenone                 | 15.153                  | 341.00                 | 107.15              | 187.25 | 235.15 |
| progesterone              | 17.880                  | 315.00                 | 97.10               | 109.10 | 297.30 |
| THC-COOH D <sub>3</sub>   | 19.956                  | 348.00                 | 330.20              | 302.25 | 196.25 |
| THC-COOH                  | 19.982                  | 345.00                 | 327.10              | 299.25 | 193.30 |
